# Supplementary material for: Whole blood transcriptomic investigation identifies long non-coding RNAs as regulators in sepsis
Source: J Transl Med. 2020 May 29;18:217. doi: 10.1186/s12967-020-02372-2 (PMC7257169; doi:10.1186/s12967-020-02372-2)
Supplement: Supplementary file 2 — Additional file 2: Supplementary table of the curated sepsis miRNA biomarkers. [file 12967_2020_2372_MOESM2_ESM.xlsx]

## Sheet: miRNA biomarkers
miRNA	Subject	Reference	Review paper
let-7a	22 Urosepsis, 20 Healthy	Expression profile of MicroRNAs in gram-negative bacterial sepsis. Shock 2015, 43, 121–127	Int. J. Mol. Sci. 2016, 17, 78; doi:10.3390/ijms17010078
let-7i	50 Sepsis, 30 SIRS, 20 Healthy	Serum miR-146a and miR-223 as potential new biomarkers for sepsis. Biochem. Biophys. Res. Commun. 2010, 394, 184–188.	Int. J. Mol. Sci. 2016, 17, 78; doi:10.3390/ijms17010078
miR-122	138 Sepsis, 76 Healthy	Elevated miR-122 serum levels are an independent marker of liver injury in inflammatory diseases. Liver Int. 2015, 35, 1172–1184	Int. J. Mol. Sci. 2016, 17, 78; doi:10.3390/ijms17010078
miR-122	123 severe Sepsis, 43 mild Sepsis, 24 Healthy	Four serum microRNAs identified as diagnostic biomarkers of sepsis. J. Trauma Acute Care Surg. 2012, 73, 850–854	Int. J. Mol. Sci. 2016, 17, 78; doi:10.3390/ijms17010078
miR-122	232 Sepsis, 24 Healthy	Serum miR-122 correlates with short-term mortality in sepsis patients. Trauma 2014, 25, 10–17.	Int. J. Mol. Sci. 2016, 17, 78; doi:10.3390/ijms17010078
miR-1249	22 Urosepsis, 20 Healthy	Expression profile of MicroRNAs in gram-negative bacterial sepsis. Shock 2015, 43, 121–127	Int. J. Mol. Sci. 2016, 17, 78; doi:10.3390/ijms17010078
miR-126	50 Sepsis, 30 SIRS, 20 Healthy	Serum miR-146a and miR-223 as potential new biomarkers for sepsis. Biochem. Biophys. Res. Commun. 2010, 394, 184–188.	Int. J. Mol. Sci. 2016, 17, 78; doi:10.3390/ijms17010078
miR-132	50 Sepsis, 30 SIRS, 20 Healthy	Serum miR-146a and miR-223 as potential new biomarkers for sepsis. Biochem. Biophys. Res. Commun. 2010, 394, 184–188.	Int. J. Mol. Sci. 2016, 17, 78; doi:10.3390/ijms17010078
miR-133a	138 Sepsis, 85 Non-Sepsis, 76 Healthy	Levels of circulating miR-133a are elevated in sepsis and predict mortality in critically ill patients. Crit. Care Med. 2014, 42, 1096–1104.	Int. J. Mol. Sci. 2016, 17, 78; doi:10.3390/ijms17010078
miR-146a	40 septic shock, 29 Sepsis, 24 Healthy	Detection of microRNAs in patients with sepsis. J. Acute Dis. 2015, 4, 101–106.	Int. J. Mol. Sci. 2016, 17, 78; doi:10.3390/ijms17010078
miR-146a	50 Sepsis, 30 SIRS, 20 Healthy	Serum miR-146a and miR-223 as potential new biomarkers for sepsis. Biochem. Biophys. Res. Commun. 2010, 394, 184–188.	Int. J. Mol. Sci. 2016, 17, 78; doi:10.3390/ijms17010078
miR-150	40 septic shock, 29 Sepsis, 24 Healthy	Detection of microRNAs in patients with sepsis. J. Acute Dis. 2015, 4, 101–106.	Int. J. Mol. Sci. 2016, 17, 78; doi:10.3390/ijms17010078
miR-150	22 Urosepsis, 20 Healthy	Expression profile of MicroRNAs in gram-negative bacterial sepsis. Shock 2015, 43, 121–127	Int. J. Mol. Sci. 2016, 17, 78; doi:10.3390/ijms17010078
miR-150	23 Sepsis, 22 SIRS, 21 Healthy	Genome-wide sequencing of cellular microRNAs identifies a combinatorial expression signature diagnostic of sepsis. PLoS One. 2013;8, e75918	Critical Care (2016) 20:383 DOI 10.1186/s13054-016-1555-3
miR-150	22 Sepsis, 22 SIRS, 17 Healthy	Genome-wide sequencing of cellular microRNAs identifies a combinatorial expression signature diagnostic of sepsis. PLoS One. 2013;8, e75918	Int. J. Mol. Sci. 2016, 17, 78; doi:10.3390/ijms17010078
miR-150	24 Sepsis, 32 Healthy	MicroRNA fingerprints identify miR-150 as a plasma prognostic marker in patients with sepsis. PLoS ONE 2009, 4, e740558	Int. J. Mol. Sci. 2016, 17, 78; doi:10.3390/ijms17010078
miR-150	138 Sepsis, 85 Non-Sepsis, 76 Healthy	Circulating microRNA-150 serum levels predict survival in patients with critical illness and sepsis. PLoS ONE 2013, 8, e54612.	Int. J. Mol. Sci. 2016, 17, 78; doi:10.3390/ijms17010078
miR-155	50 Sepsis, 30 SIRS, 20 Healthy	Serum miR-146a and miR-223 as potential new biomarkers for sepsis. Biochem. Biophys. Res. Commun. 2010, 394, 184–188.	Int. J. Mol. Sci. 2016, 17, 78; doi:10.3390/ijms17010078
miR-15a	166 Sepsis, 32 SIRS, 24 Healthy	Evidence for serum miR-15a and miR-16 levels as biomarkers that distinguish sepsis from systemic inflammatory response syndrome in human subjects. Clin. Chem. Lab. Med. 2012, 50, 1423–1428	Int. J. Mol. Sci. 2016, 17, 78; doi:10.3390/ijms17010078
miR-15a	62 Sepsis, 32 Healthy	Plasma levels of microRNA are altered with the development of shock in human sepsis: an observational study.Crit Care. 2015;19:440	Critical Care (2016) 20:383 DOI 10.1186/s13054-016-1555-3
miR-15b	123 severe Sepsis, 43 mild Sepsis, 24 Healthy	Four serum microRNAs identified as diagnostic biomarkers of sepsis. J. Trauma Acute Care Surg. 2012, 73, 850–854	Int. J. Mol. Sci. 2016, 17, 78; doi:10.3390/ijms17010078
miR-16	166 Sepsis, 32 SIRS, 24 Healthy	Evidence for serum miR-15a and miR-16 levels as biomarkers that distinguish sepsis from systemic inflammatory response syndrome in human subjects. Clin. Chem. Lab. Med. 2012, 50, 1423–1428	Int. J. Mol. Sci. 2016, 17, 78; doi:10.3390/ijms17010078
miR-182	24 Sepsis, 32 Healthy	MicroRNA fingerprints identify miR-150 as a plasma prognostic marker in patients with sepsis. PLoS ONE 2009, 4, e740558	Int. J. Mol. Sci. 2016, 17, 78; doi:10.3390/ijms17010078
miR-191	22 Sepsis, 22 SIRS, 17 Healthy	Genome-wide sequencing of cellular microRNAs identifies a combinatorial expression signature diagnostic of sepsis. PLoS One. 2013;8, e75918	Int. J. Mol. Sci. 2016, 17, 78; doi:10.3390/ijms17010078
miR-193b	123 severe Sepsis, 43 mild Sepsis, 24 Healthy	Four serum microRNAs identified as diagnostic biomarkers of sepsis. J. Trauma Acute Care Surg. 2012, 73, 850–854	Int. J. Mol. Sci. 2016, 17, 78; doi:10.3390/ijms17010078
miR-193b	232 Sepsis, 24 Healthy	Serum miR-122 correlates with short-term mortality in sepsis patients. Trauma 2014, 25, 10–17.	Int. J. Mol. Sci. 2016, 17, 78; doi:10.3390/ijms17010078
miR-199b-5p	22 Urosepsis, 20 Healthy	Expression profile of MicroRNAs in gram-negative bacterial sepsis. Shock 2015, 43, 121–127	Int. J. Mol. Sci. 2016, 17, 78; doi:10.3390/ijms17010078
miR-223	137 Sepsis, 84 Non-Sepsis, 75 Healthy	Circulating microRNA-223 serum levels do not predict sepsis or survival in patients with critical illness. Dis. Markers. 2015, 2015, 384208	Int. J. Mol. Sci. 2016, 17, 78; doi:10.3390/ijms17010078
miR-223	40 septic shock, 29 Sepsis, 24 Healthy	Detection of microRNAs in patients with sepsis. J. Acute Dis. 2015, 4, 101–106.	Int. J. Mol. Sci. 2016, 17, 78; doi:10.3390/ijms17010078
miR-223	166 Sepsis, 24 Normal control	Four serum microRNAs identified as diagnostic biomarkers of sepsis. J Trauma Acute Care Surg. 2012;73:850–4	Critical Care (2016) 20:383 DOI 10.1186/s13054-016-1555-3
miR-223	123 severe Sepsis, 43 mild Sepsis, 24 Healthy	Four serum microRNAs identified as diagnostic biomarkers of sepsis. J. Trauma Acute Care Surg. 2012, 73, 850–854	Int. J. Mol. Sci. 2016, 17, 78; doi:10.3390/ijms17010078
miR-223	50 Sepsis, 30 SIRS, 20 Healthy	Serum miR-146a and miR-223 as potential new biomarkers for sepsis. Biochem. Biophys. Res. Commun. 2010, 394, 184–188.	Int. J. Mol. Sci. 2016, 17, 78; doi:10.3390/ijms17010078
miR-27a	62 Sepsis, 32 Healthy	Plasma levels of microRNA are altered with the development of shock in human sepsis: an observational study.Crit Care. 2015;19:440	Critical Care (2016) 20:383 DOI 10.1186/s13054-016-1555-3
miR-3173-5p	22 Sepsis, 22 SIRS, 17 Healthy	Genome-wide sequencing of cellular microRNAs identifies a combinatorial expression signature diagnostic of sepsis. PLoS One. 2013;8, e75918	Int. J. Mol. Sci. 2016, 17, 78; doi:10.3390/ijms17010078
miR-342-3p	22 Sepsis, 22 SIRS, 17 Healthy	Genome-wide sequencing of cellular microRNAs identifies a combinatorial expression signature diagnostic of sepsis. PLoS One. 2013;8, e75918	Int. J. Mol. Sci. 2016, 17, 78; doi:10.3390/ijms17010078
miR-342-5p	24 Sepsis, 32 Healthy	MicroRNA fingerprints identify miR-150 as a plasma prognostic marker in patients with sepsis. PLoS ONE 2009, 4, e740558	Int. J. Mol. Sci. 2016, 17, 78; doi:10.3390/ijms17010078
miR-34a	62 Sepsis, 32 Healthy	Plasma levels of microRNA are altered with the development of shock in human sepsis: an observational study.Crit Care. 2015;19:440	Critical Care (2016) 20:383 DOI 10.1186/s13054-016-1555-3
miR-4772-3p	22 Sepsis, 22 SIRS, 17 Healthy	Genome-wide sequencing of cellular microRNAs identifies a combinatorial expression signature diagnostic of sepsis. PLoS One. 2013;8, e75918	Int. J. Mol. Sci. 2016, 17, 78; doi:10.3390/ijms17010078
miR-4772-5p	22 Sepsis, 22 SIRS, 17 Healthy	Genome-wide sequencing of cellular microRNAs identifies a combinatorial expression signature diagnostic of sepsis. PLoS One. 2013;8, e75918	Int. J. Mol. Sci. 2016, 17, 78; doi:10.3390/ijms17010078
miR-4772-5p	22 Sepsis, 22 SIRS, 17 Healthy	Genome-wide sequencing of cellular microRNAs identifies a combinatorial expression signature diagnostic of sepsis. PLoS One. 2013;8, e75918	Int. J. Mol. Sci. 2016, 17, 78; doi:10.3390/ijms17010078
miR-4772-5p-iso	23 Sepsis, 22 SIRS, 21 Healthy	Genome-wide sequencing of cellular microRNAs identifies a combinatorial expression signature diagnostic of sepsis. PLoS One. 2013;8, e75918	Critical Care (2016) 20:383 DOI 10.1186/s13054-016-1555-3
miR-483-5p	123 severe Sepsis, 43 mild Sepsis, 24 Healthy	Four serum microRNAs identified as diagnostic biomarkers of sepsis. J. Trauma Acute Care Surg. 2012, 73, 850–854	Int. J. Mol. Sci. 2016, 17, 78; doi:10.3390/ijms17010078
miR-483-5p	232 Sepsis, 24 Healthy	Serum miR-122 correlates with short-term mortality in sepsis patients. Trauma 2014, 25, 10–17.	Int. J. Mol. Sci. 2016, 17, 78; doi:10.3390/ijms17010078
miR-486	24 Sepsis, 32 Healthy	MicroRNA fingerprints identify miR-150 as a plasma prognostic marker in patients with sepsis. PLoS ONE 2009, 4, e740558	Int. J. Mol. Sci. 2016, 17, 78; doi:10.3390/ijms17010078
miR-499-5p	166 Sepsis, 24 Normal control	Four serum microRNAs identified as diagnostic biomarkers of sepsis. J Trauma Acute Care Surg. 2012;73:850–4	Critical Care (2016) 20:383 DOI 10.1186/s13054-016-1555-3
miR-499-5p	123 severe Sepsis, 43 mild Sepsis, 24 Healthy	Four serum microRNAs identified as diagnostic biomarkers of sepsis. J. Trauma Acute Care Surg. 2012, 73, 850–854	Int. J. Mol. Sci. 2016, 17, 78; doi:10.3390/ijms17010078
miR-574-5p	232 Sepsis, 24 Healthy	Serum miR-122 correlates with short-term mortality in sepsis patients. Trauma 2014, 25, 10–17.	Int. J. Mol. Sci. 2016, 17, 78; doi:10.3390/ijms17010078
